# Supplementary material for: Immobilizing ultrasmall Pt nanocrystals on 3D interweaving BCN nanosheet-graphene networks enables efficient methanol oxidation reaction
Source: Royal Society of Chemistry journal article supplement (doi:10.1039/d3dt02512h), 2023-01-01
Supplement: d3dt02512h1.pdf [file d3dt02512h1.pdf]

## Electronic Supplementary Information

### Immobilizing ultrasmall Pt nanocrystals onto 3D interweaving BCN nanosheet-graphene networks enables efficient methanol oxidation reaction

Binfeng Shen, Yujie Wei, Pengyun Sun, Haiyan He, Guobing Ying,\* Huajie Huang\*

College of Mechanics and Materials, Hohai University, Nanjing 210098, China

\*E-mail: yinggb2010@126.com or huanghuajie@hhu.edu.cn

#### Supplementary Results:

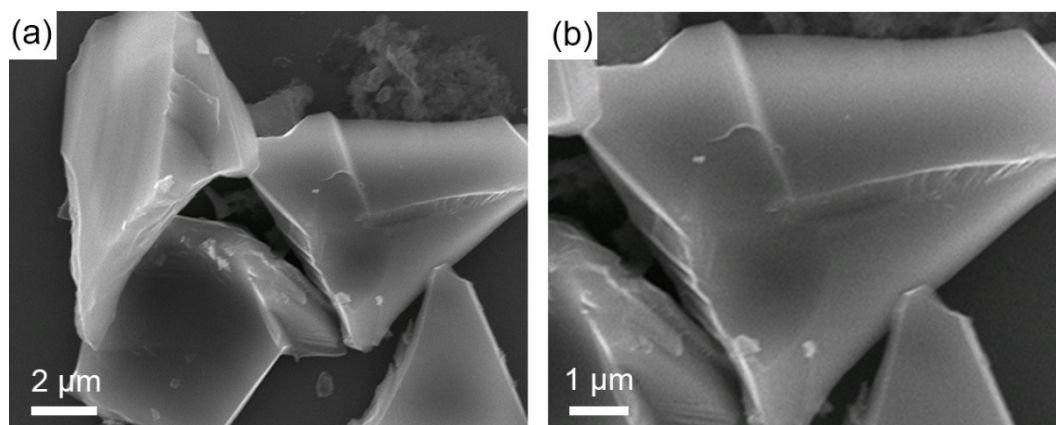

**Fig. S1** Typical FE-SEM images of the bulk g-C<sub>3</sub>N<sub>4</sub> powder at different magnifications.

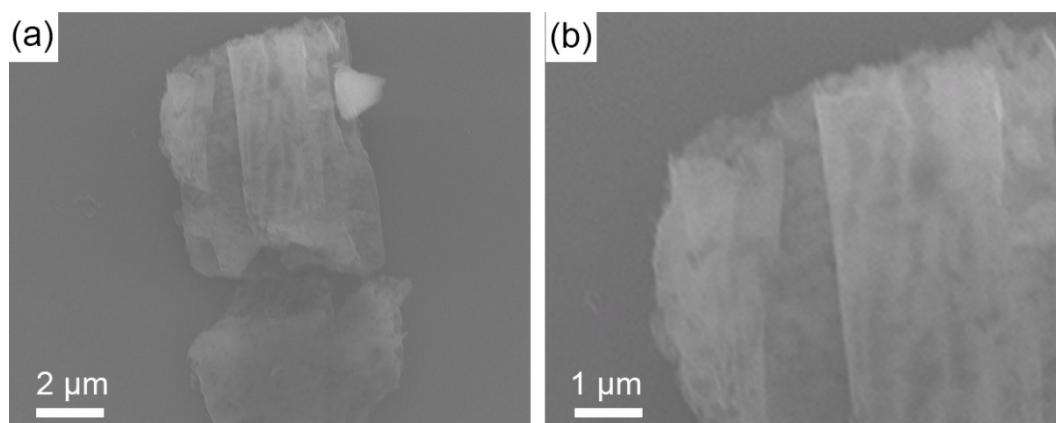

**Fig. S2** Typical FE-SEM images of the exfoliated  $g\text{-C}_3\text{N}_4$  nanosheets at different magnifications.

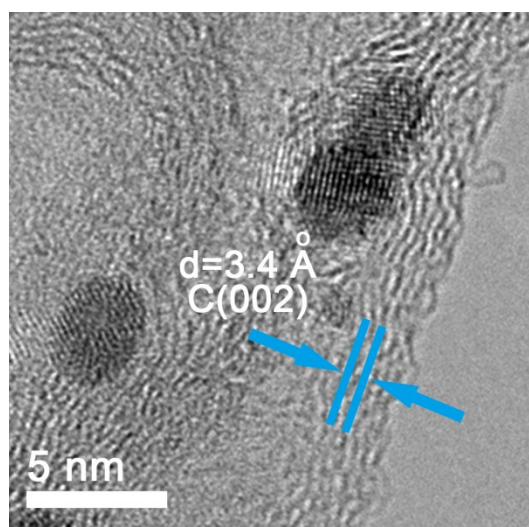

**Fig. S3** HR-TEM image of the 3D Pt/BCN-G nanoarchitecture shows the lattice fringes of graphene nanosheets.

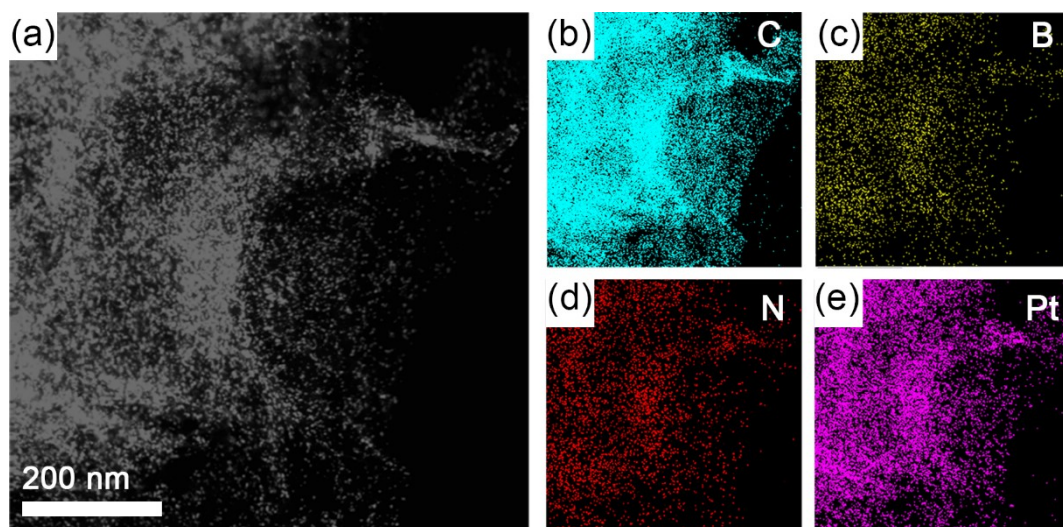

**Fig. S4** (a) Low-magnification HAADF-STEM and the corresponding elemental mapping images reveal the homogeneous dispersion of (b) C, (c) B, (d) N and (e) Pt elements in the Pt/BCN-G nanoarchitecture.

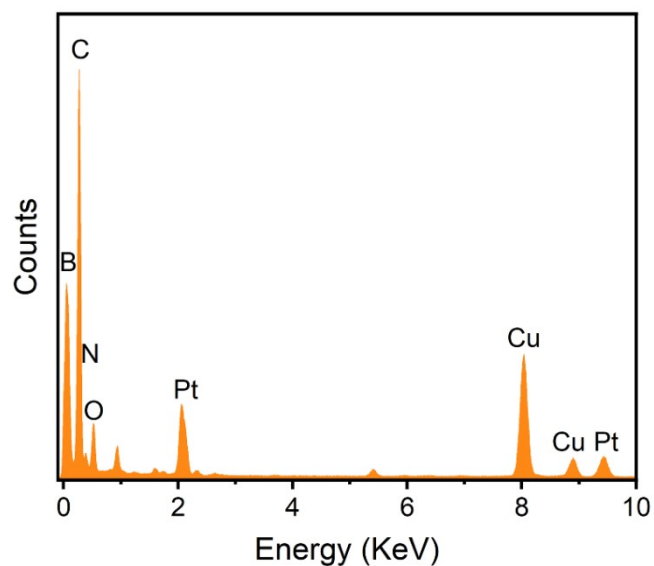

**Fig. S5** EDX spectrum of the 3D Pt/BCN-G nanoarchitecture verifies the presence of C, B, N and Pt components in the hybrid.

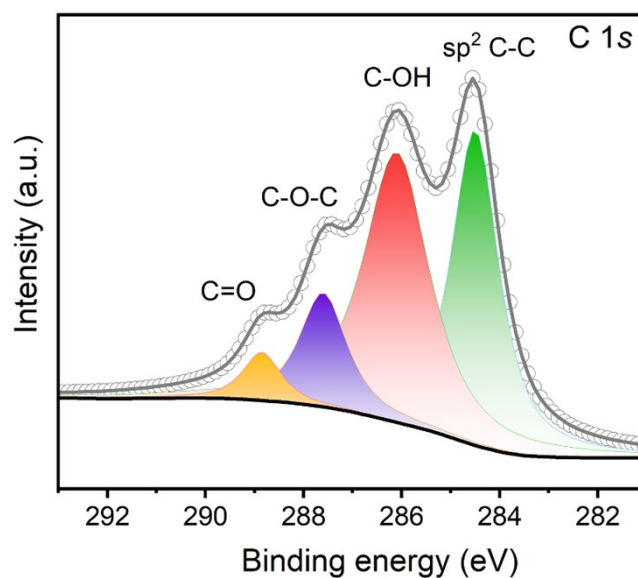

**Fig. S6** High-resolution C 1s XPS spectrum of GO, indicating that the carbon sheets possess a large number of oxygen functional groups.

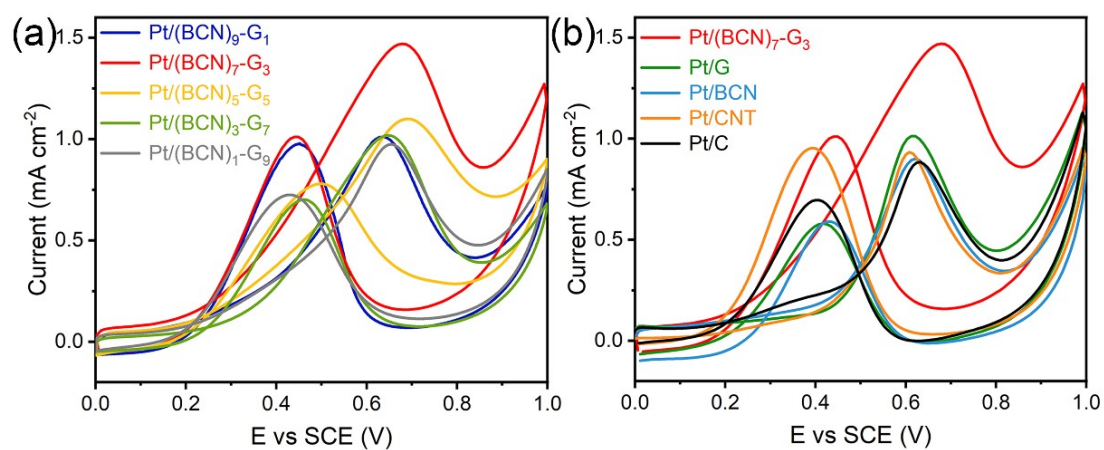

**Fig. S7** The ECSA-normalized CV curves of (a) the Pt/BCN-G electrodes with different BCN/G ratios, and (b) Pt/(BCN)<sub>7</sub>-G<sub>3</sub>, Pt/G, Pt/BCN, Pt/CNT, and Pt/C electrodes in 0.5 M H<sub>2</sub>SO<sub>4</sub> and 1 M CH<sub>3</sub>OH solution at 50 mV s<sup>-1</sup>.

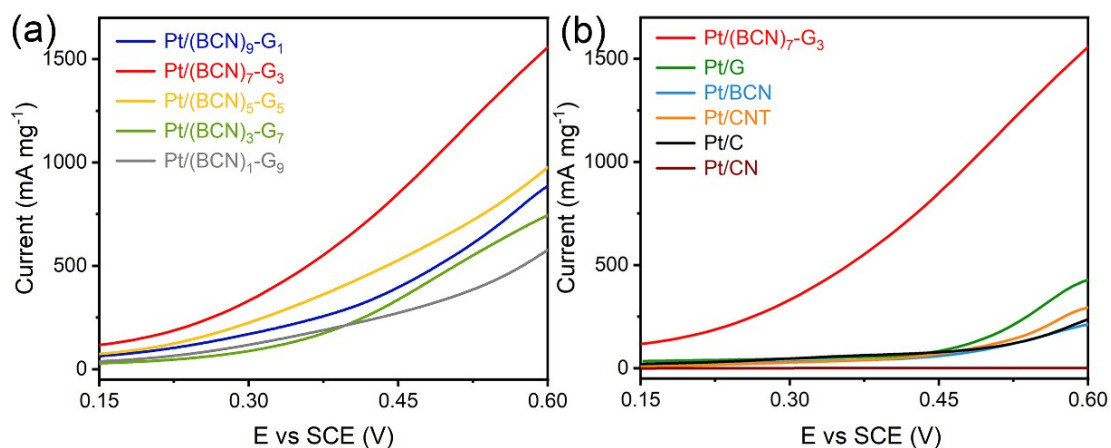

**Fig. S8** (a) LSV curves of (a) the Pt/BCN-G electrodes with different BCN/G ratios and (b) Pt/(BCN)<sub>7</sub>-G<sub>3</sub>, Pt/G, Pt/BCN, Pt/CNT, Pt/C and Pt/CN electrodes in 0.5 M H<sub>2</sub>SO<sub>4</sub> and 1 M CH<sub>3</sub>OH solution at 50 mV s<sup>-1</sup>.

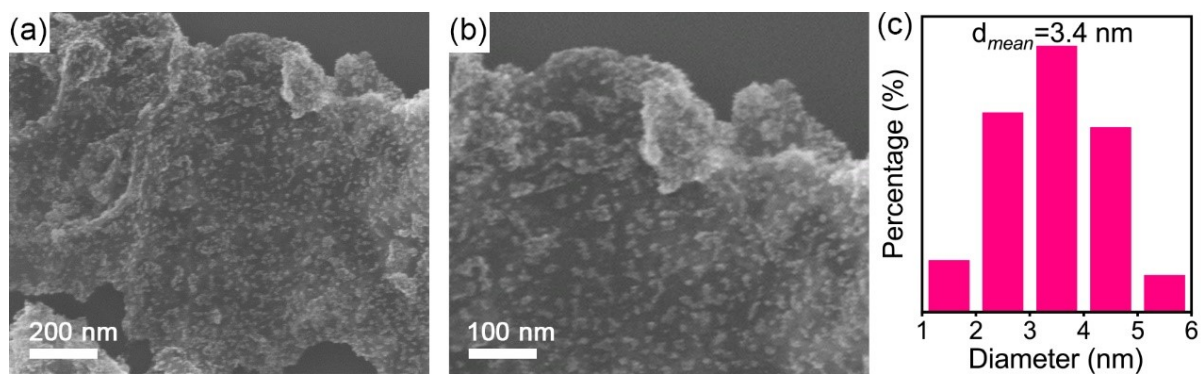

**Fig. S9** (a-b) FE-SEM images and (c) corresponding Pt size distribution of the Pt/BCN-G catalyst after the long-term stability test.

**Table S1** The B and N contents in various Pt/BCN-G catalysts.

| Catalyst                              | B (at%) | N (at%) |
|---------------------------------------|---------|---------|
| Pt/(BCN) <sub>1</sub> -G <sub>9</sub> | 1.0     | 2.6     |
| Pt/(BCN) <sub>3</sub> -G <sub>7</sub> | 1.7     | 7.7     |
| Pt/(BCN) <sub>5</sub> -G <sub>5</sub> | 4.8     | 12.8    |
| Pt/(BCN) <sub>7</sub> -G <sub>3</sub> | 6.6     | 18.0    |
| Pt/(BCN) <sub>9</sub> -G <sub>1</sub> | 8.5     | 23.2    |

**Table S2** Compiled study comparing CV results for different catalysts.

| Electrode                             | ECSA<br>(m <sup>2</sup> g <sup>-1</sup> ) | Mass activity<br>(mA mg <sup>-1</sup> ) | Specific activity<br>(mA cm <sup>-2</sup> ) |
|---------------------------------------|-------------------------------------------|-----------------------------------------|---------------------------------------------|
| Pt/(BCN) <sub>1</sub> -G <sub>9</sub> | 69.9                                      | 680.1                                   | 0.97                                        |
| Pt/(BCN) <sub>3</sub> -G <sub>7</sub> | 79.2                                      | 806.5                                   | 1.02                                        |
| Pt/(BCN) <sub>5</sub> -G <sub>5</sub> | 110.4                                     | 1213.5                                  | 1.10                                        |
| Pt/(BCN) <sub>7</sub> -G <sub>3</sub> | 121.2                                     | 1782.2                                  | 1.47                                        |
| Pt/(BCN) <sub>9</sub> -G <sub>1</sub> | 93.6                                      | 946.3                                   | 1.01                                        |
| Pt/G                                  | 43.3                                      | 438.5                                   | 1.01                                        |
| Pt/BCN                                | 24.6                                      | 221.5                                   | 0.9                                         |
| Pt/CNT                                | 31.9                                      | 297.7                                   | 0.93                                        |
| Pt/C                                  | 29.7                                      | 262.5                                   | 0.88                                        |

**Table S3** Comparison of methanol oxidation behavior of the 3D Pt/(BCN)<sub>7</sub>-G<sub>3</sub> catalyst with various state-of-the-art Pt-based electrocatalysts.

| Electrode                                            | ECSA<br>(m <sup>2</sup> g <sup>-1</sup> ) | Mass activity<br>(mA mg <sup>-1</sup> ) | Electrolyte                                                    | Ref.      |
|------------------------------------------------------|-------------------------------------------|-----------------------------------------|----------------------------------------------------------------|-----------|
| Pt/(BCN) <sub>7</sub> -G <sub>3</sub>                | 121.2                                     | 1782.2                                  | 0.5 M H <sub>2</sub> SO <sub>4</sub> +1 M CH <sub>3</sub> OH   | This work |
| Pt/[BMIM]BF <sub>4</sub> /CNT                        | N. A                                      | 155.0                                   | 0.5 M H <sub>2</sub> SO <sub>4</sub> +1 M CH <sub>3</sub> OH   | [48]      |
| Pt/imidazolium-salt/CNT                              | 67.6                                      | 410.0                                   | 0.5 M H <sub>2</sub> SO <sub>4</sub> +0.5 M CH <sub>3</sub> OH | [22]      |
| Pt/N-doped graphene                                  | N. A                                      | 376.2                                   | 0.5 M H <sub>2</sub> SO <sub>4</sub> +0.5M CH <sub>3</sub> OH  | [49]      |
| Pt/RGO-Ti <sub>3</sub> C <sub>2</sub> T <sub>x</sub> | 90.1                                      | 1102.0                                  | 0.5 M H <sub>2</sub> SO <sub>4</sub> +1 M CH <sub>3</sub> OH   | [37]      |
| Pt/RGO/CNT                                           | 117.3                                     | 691.1                                   | 0.5 M H <sub>2</sub> SO <sub>4</sub> +1 M CH <sub>3</sub> OH   | [50]      |
| Pt/G-C <sub>3</sub> N <sub>4</sub>                   | 69.0                                      | 621.8                                   | 0.5 M H <sub>2</sub> SO <sub>4</sub> +1 M CH <sub>3</sub> OH   | [39]      |
| Pt/RGO-MoS <sub>2</sub>                              | 104.3                                     | 737.8                                   | 0.5 M H <sub>2</sub> SO <sub>4</sub> +1 M CH <sub>3</sub> OH   | [51]      |
| PtPd dendrites/RGO                                   | 81.6                                      | 647.2                                   | 0.5 M H <sub>2</sub> SO <sub>4</sub> +1 M CH <sub>3</sub> OH   | [52]      |
